# Supplementary material for: Long 5′ untranslated regions regulate the RNA stability of the deep-sea filamentous phage SW1
Source: PubMed Central journal article supplement (PMC4762005; doi:10.1038/srep21908), 2016-02-22
Supplement: srep21908-s1.pdf [file srep21908-s1.pdf]

## **Supplementary Information**

**Long 5' untranslated regions regulate the RNA stability of the  
deep-sea filamentous phage SW1**

**Huahua Jian, Lei Xiong, Guanpeng Xu, Xiang Xiao, Fengping Wang**

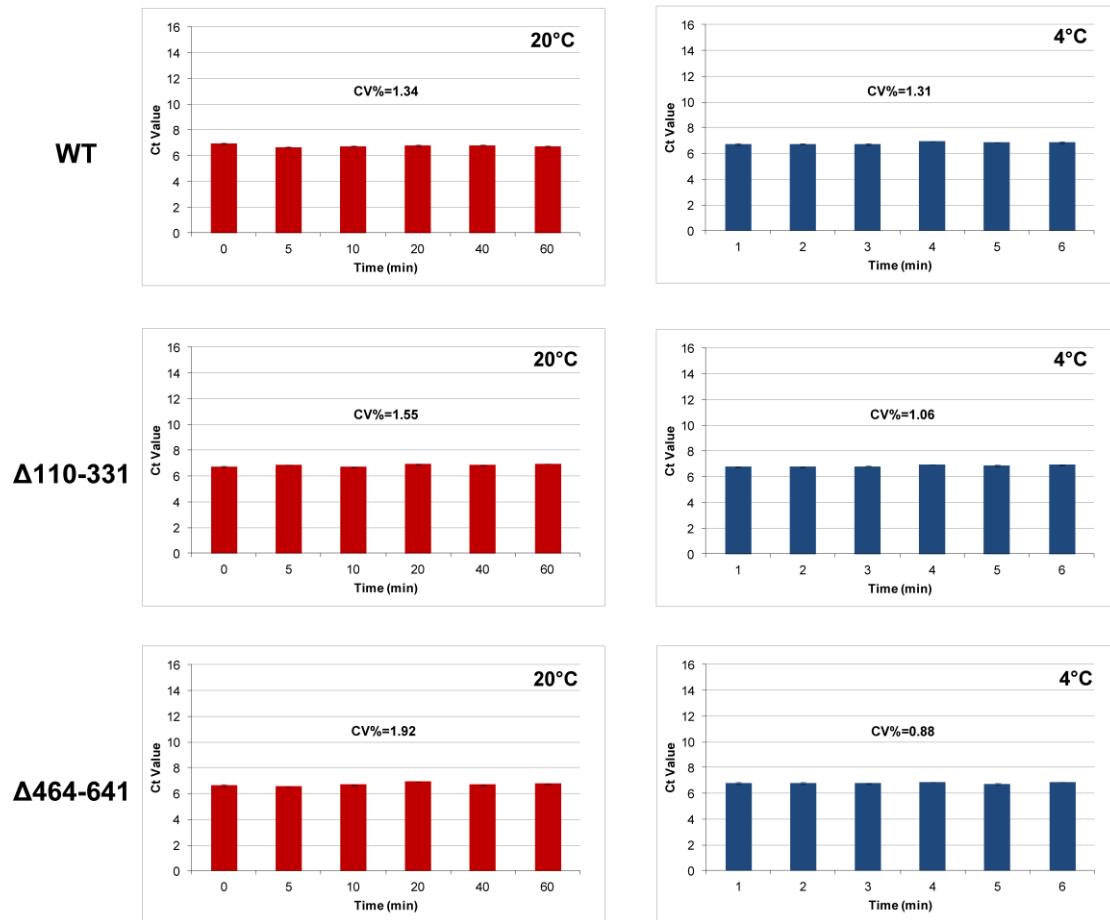

Figure S1. Stability of 16s rRNA of WP3 in the RNA decay assays. The total RNA was reverse transcribed and the Ct values of 16S rRNA gene have been detected by real-time qPCR using cDNA. The Coefficient of Variation (CV%) was calculated and shown. As the Ct levels are inversely proportional to the amount of target nucleic acid in the sample, the low CV value ( $CV\% < 2$ ) means that the 16S rRNA is stable under the test conditions and it can be used as the reference for RNA decay experiment.

**Table S1 Primers used in this study**

| Name          | Sequence (5'-3')                     | Description        |
|---------------|--------------------------------------|--------------------|
| fpsA-B For    | GATTGGGCGGCGTTCTGTAT                 | co-transcription   |
| fpsA-B Rev    | ACCGTTTGGGTCGGGTAAGT                 | co-transcription   |
| fpsB-C For    | TATGAAAGACCCTAAAACGCTACA             | co-transcription   |
| fpsB-C Rev    | CACAATGACAAGGAACCCAAA                | co-transcription   |
| fpsC-D For    | ACTCTTTGGGTTCTTGTTCATTG              | co-transcription   |
| fpsC-D Rev    | AAACATCGGCGGGGTCTATT                 | co-transcription   |
| fpsD-E For    | TTAGTGCAATCCACGCAATCT                | co-transcription   |
| fpsD-E Rev    | ACACCTGTACCAGCAATGAAAGT              | co-transcription   |
| fpsE-F For    | CTGCGGTAGATTTAGCAAGTGTT              | co-transcription   |
| fpsE-F Rev    | AGATAATCATCGGGCGGACA                 | co-transcription   |
| fpsF-G For    | TAGAAGAAAACGAAAATGATACGC             | co-transcription   |
| fpsF-G Rev    | ACCATCCAATAGAAACACCACC               | co-transcription   |
| fpsG-H For    | GGTGGTGTTCCTATTGGATGGT               | co-transcription   |
| fpsG-H Rev    | TGCGGTATTAGGTCTGCTTTTAT              | co-transcription   |
| fpsRD1 For    | TTTTGGGGAGTATTGAGGGG                 | co-transcription   |
| fpsRD2 For    | AACTTCATTTGGTTTTGTACGC               | co-transcription   |
| fpsRD3 For    | AGGGGATGCACAGCAGATAT                 | co-transcription   |
| fpsRD4 For    | AATACTGGCCGTCCGCTAA                  | co-transcription   |
| fpsRD5 For    | CACGCCATACGTTAATGAGTCTCT             | co-transcription   |
| fpsRD Rev     | GTGTATCCACGGCACAACCTATCT             | co-transcription   |
| fpsAP For     | GGTTTGGATTGTTTTGTTTCGC               | EMSA               |
| fpsAP Rev     | CGCAAGCGTACAACCTAAAGA                | EMSA               |
| fpsRP For     | CGTTCAGGTTTGCTTGTCTTG                | EMSA               |
| fpsRP Rev     | ACTGGCAATGAGTAAGAAGAG                | EMSA               |
| fpsRHis For   | GGTCGCGGATCCATGACAATTGGTGAAAATATAAAG | Protein expression |
| fpsRHis Rev   | CGCTGAAAGCTTTTAACCCTGTTTTTTCTTTTCTTT | Protein expression |
| fpsApPE       | AAGGTGTCGGTAAATCCTGTAA               | Primer extension   |
| fpsRpPE       | TGTCATTCCAAGGCTTTTACGCT              | Primer extension   |
| SW1-331-For   | TGTGTCCGGAAACTCACTTATTCAGAAGATTC     | UTR deletion       |
| SW1-110-Rev   | ACAATCCGGAGATCAAACATGCAAGAAAATAG     | UTR deletion       |
| SW1-641-For   | CTGCTCCGGATCGACTTACCGAACTAGGCCAC     | UTR deletion       |
| SW1-464-Rev   | TAACTCCGGATGAGTAAGAAGAGATCTTATCT     | UTR deletion       |
| fpsART For    | GGCCACAACGCTACAATGG                  | qPCR               |
| fpsART Rev    | TGTTGCGCCTTTTCCTTAGCT                | qPCR               |
| fpsRRT For    | AACCTAGAAACACTTGTCGCTATATCC          | qPCR               |
| fpsRRT Rev    | TGCTCTCCAAAAACAATTTCTATCT            | qPCR               |
| fpsA5URTFFor  | CGGTTGCCAAAACCAATTG                  | qPCR               |
| fpsA5URTRRev  | CGCGGTGTTTTCGTAAC                    | qPCR               |
| fpsAR5URTFFor | CTTGCCGTTTCAGGTTTGCTT                | qPCR               |
| fpsAR5URTRRev | GCAAGTGACTACAGAGTCCGATTC             | qPCR               |
| 16SRTFFor     | CGCGAGGTGGAGCTAATCTC                 | qPCR               |
| 16SRTRRev     | TCGAGTTGCAGACTCCAATC                 | qPCR               |
